# Supplementary material for: Systemic therapy with or without transcatheter intra-arterial therapies for unresectable hepatocellular carcinoma: a real-world, multi-center study
Source: PubMed Central journal article supplement (PMC10169746; doi:10.3389/fimmu.2023.1138355), 2023-04-26
Supplement: DataSheet_1.pdf [file DataSheet_1.pdf]

**Table S1.** Weighted baseline characteristics of patients in the two groups before and after IPTW

| Characteristic                                | Unweighted          |                   |       |         | Weighted            |                   |       |         |
|-----------------------------------------------|---------------------|-------------------|-------|---------|---------------------|-------------------|-------|---------|
|                                               | Systemic-only group | Combination group | SMD   | P value | Systemic-only group | Combination group | SMD   | P value |
|                                               | N=143               | N=146             |       |         | N=287.37            | N=289.04          |       |         |
| Tumor size (mm), mean (SD)                    | 79.27 (43.18)       | 96.64 (41.59)     | 0.410 | 0.001   | 88.22 (44.94)       | 88.59 (41.35)     | 0.008 | 0.948   |
| Presence of hepatic vein invasion, cases (%)  | 12 (8.39)           | 31 (21.23)        | 0.368 | 0.004   | 39.5 (13.74)        | 42.7 (14.77)      | 0.029 | 0.822   |
| ECOG performance status score 1, cases (%)    | 28 (19.58)          | 46 (31.51)        | 0.276 | 0.029   | 69.9 (24.32)        | 72.8 (25.18)      | 0.020 | 0.873   |
| Objective response per RECIST v1.1, cases (%) | 47 (32.86)          | 53 (36.30)        | 0.072 | 0.624   | 95.8 (33.33)        | 108.0 (37.37)     | 0.084 | 0.499   |

IPTW, inverse probability of treatment weighting; ECOG, eastern cooperative oncology group; SD, standard deviation; SMD, standard mean difference; RECIST, response evaluation criteria in solid tumours.

Groups Systemic therapy Combination therapy

**A** Distributional balance for tumor size

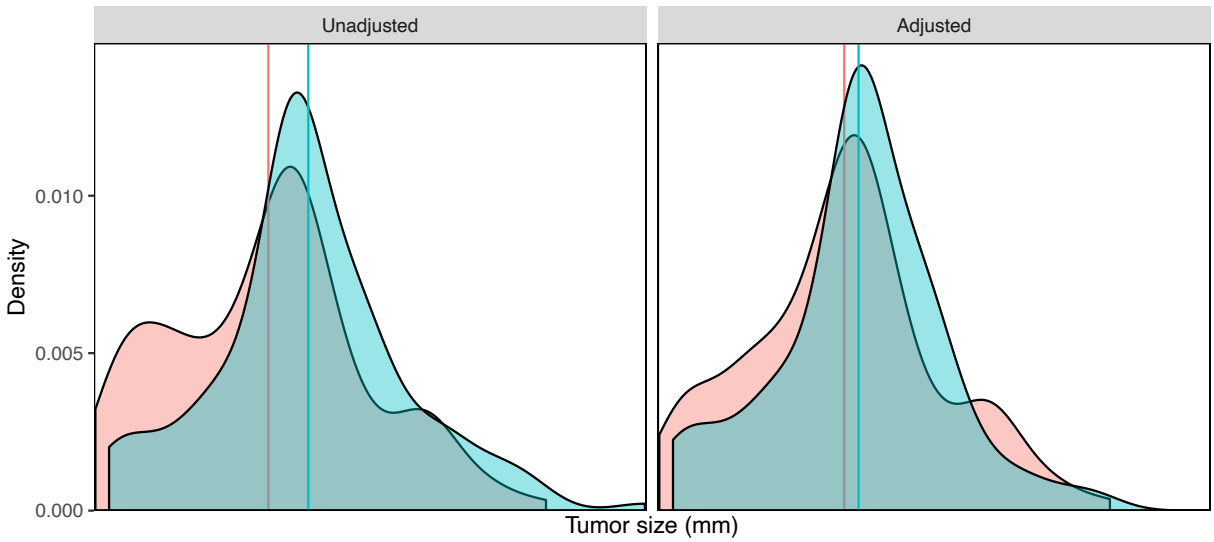

**B** Distributional balance for hepatic vein tumor thrombus

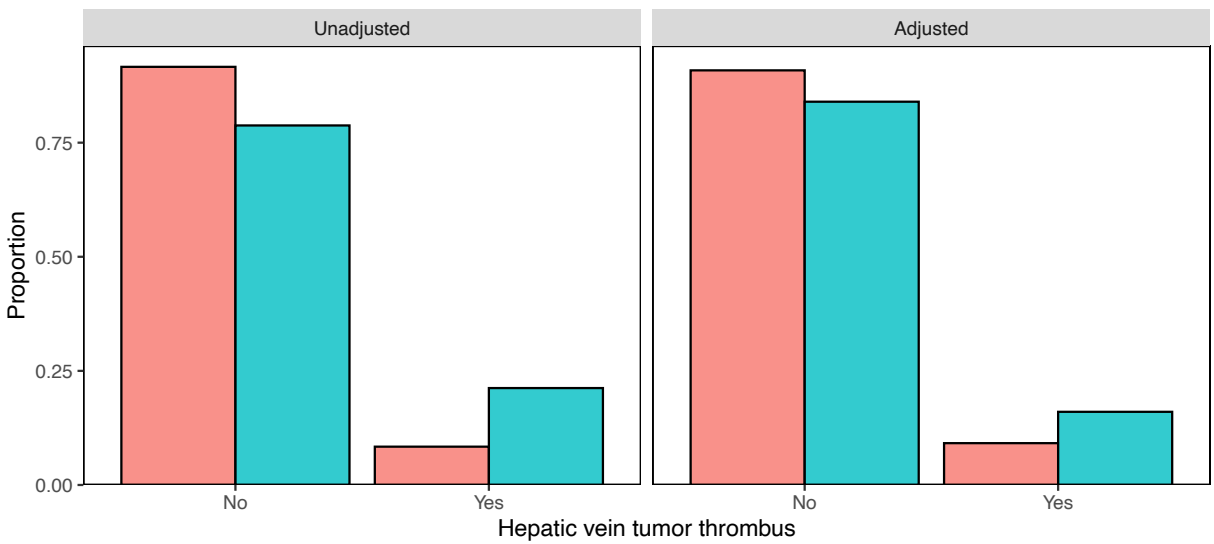

**C** Distributional balance for ECOG performance status

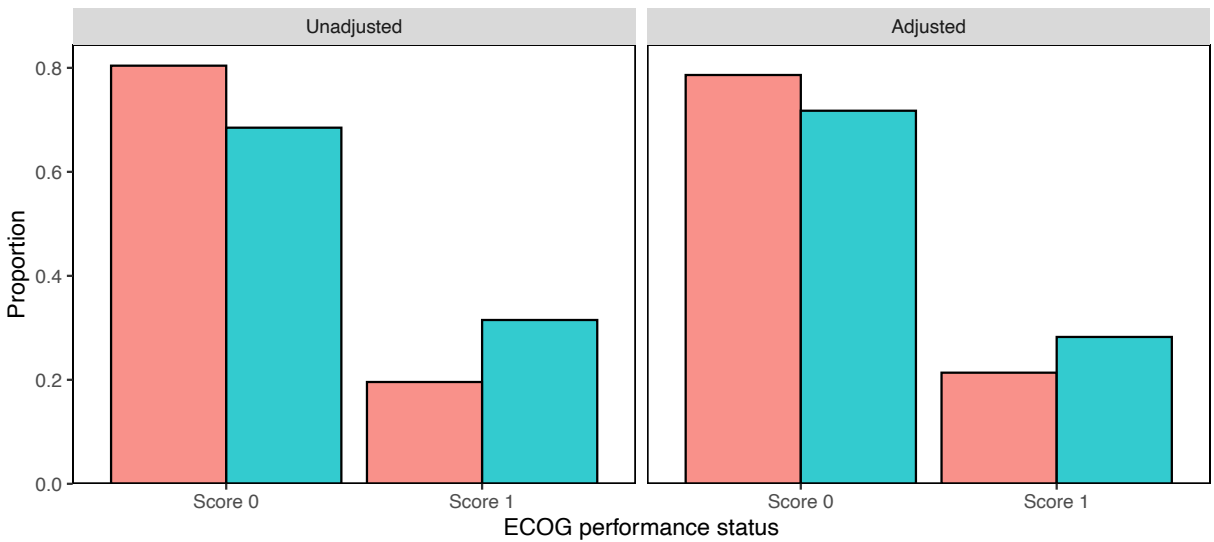

**Figure S1.** The distributions of tumor size (A), hepatic vein invasion (B), and ECOG performance status (C) before and after PSM. ECOG, Eastern Cooperative Oncology Group; PSM, propensity score matching.

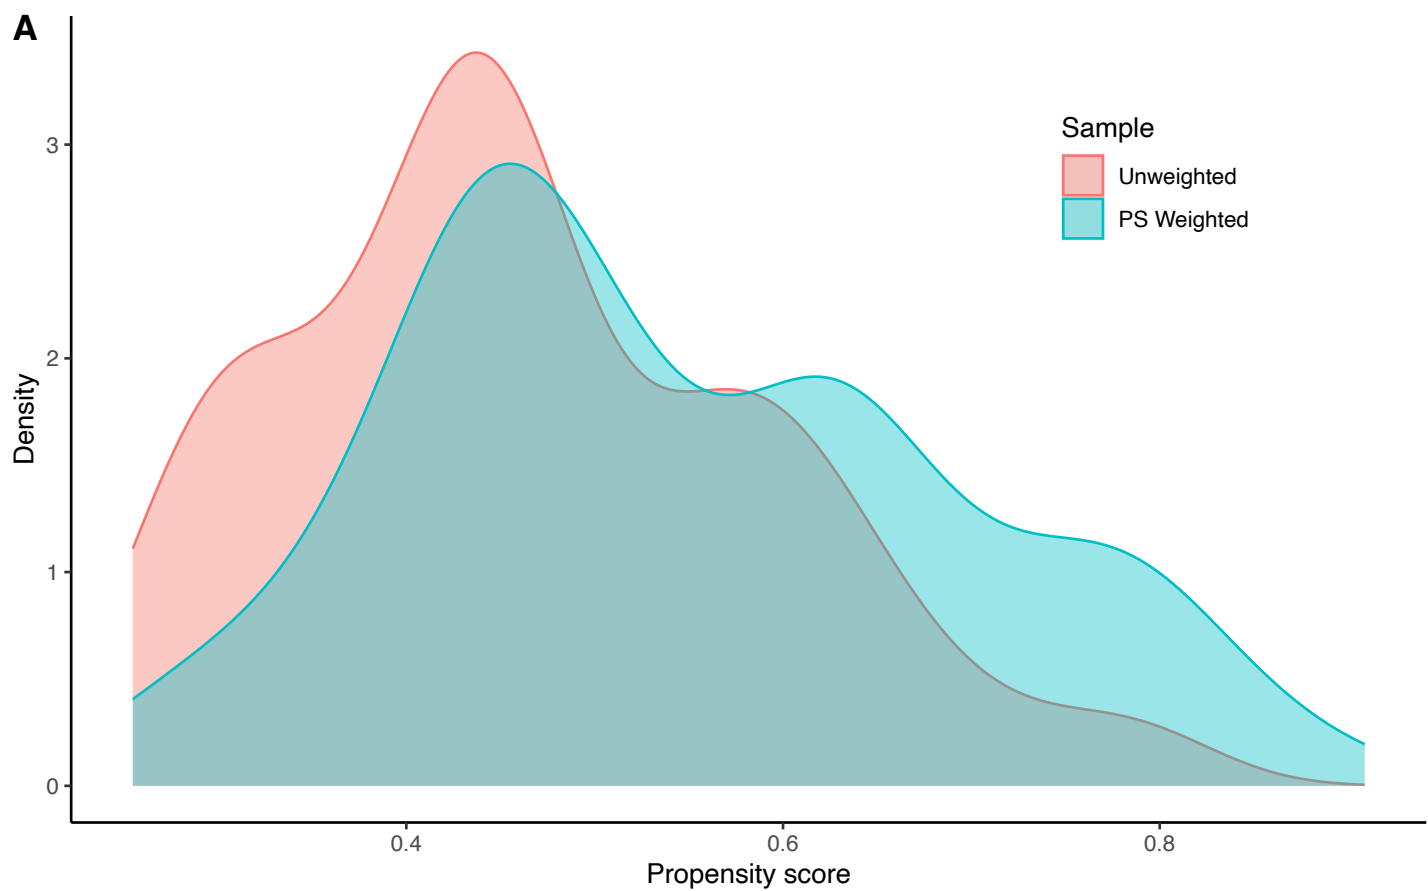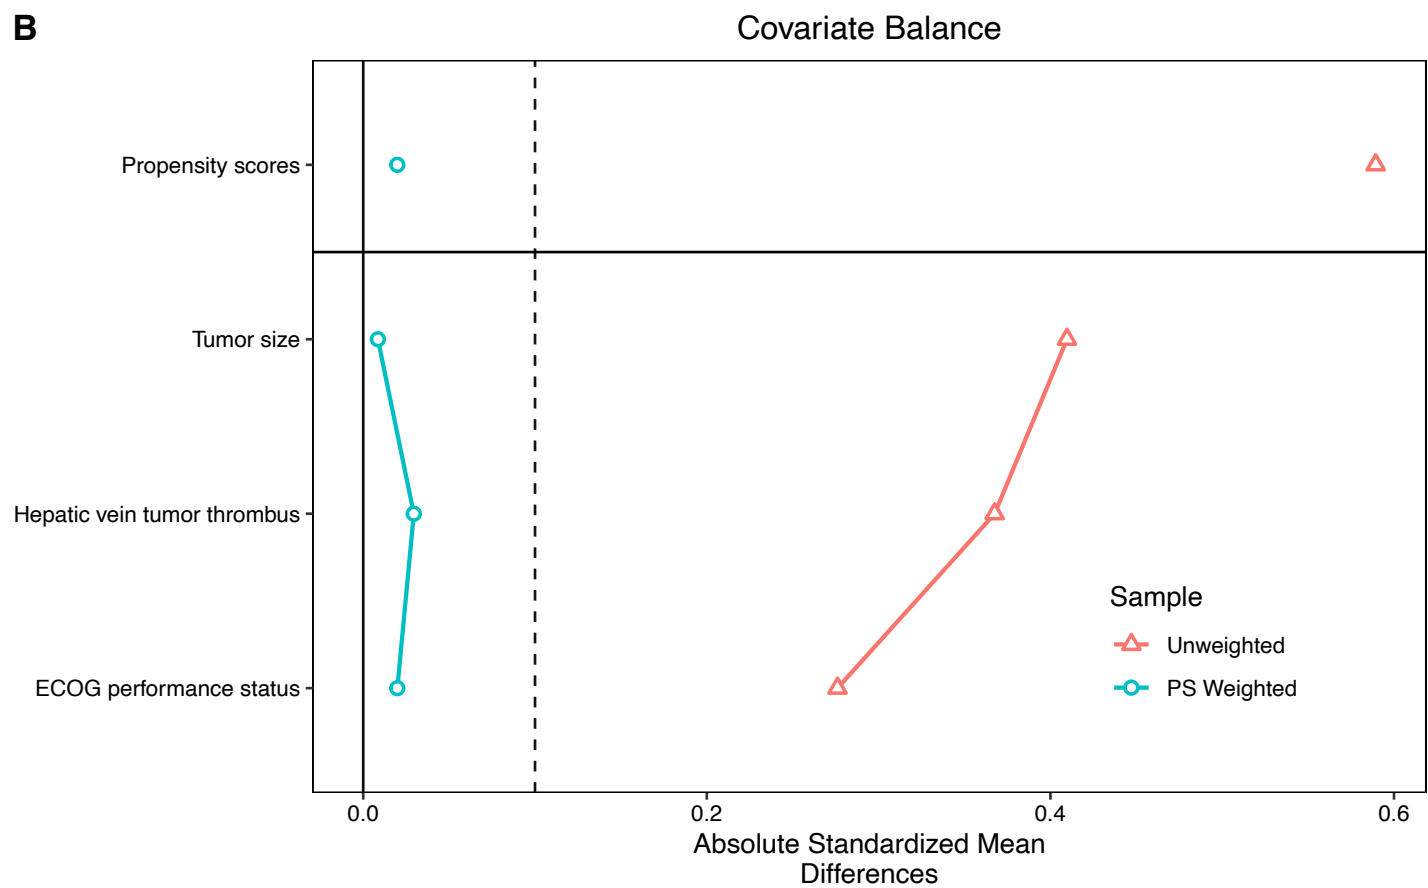

**Figure S2.** The distributions of the propensity score for unweighted and weighted cohorts by IPTW (A), and the distributions of covariate balance for unbalanced variables before and after introduced to IPTW (B). IPTW, inverse probability treatment weighting; PS, propensity score; ECOG, Eastern Cooperative Oncology Group.
